# Supplementary material
Source: PubMed Central journal article supplement (PMC4184920)

A

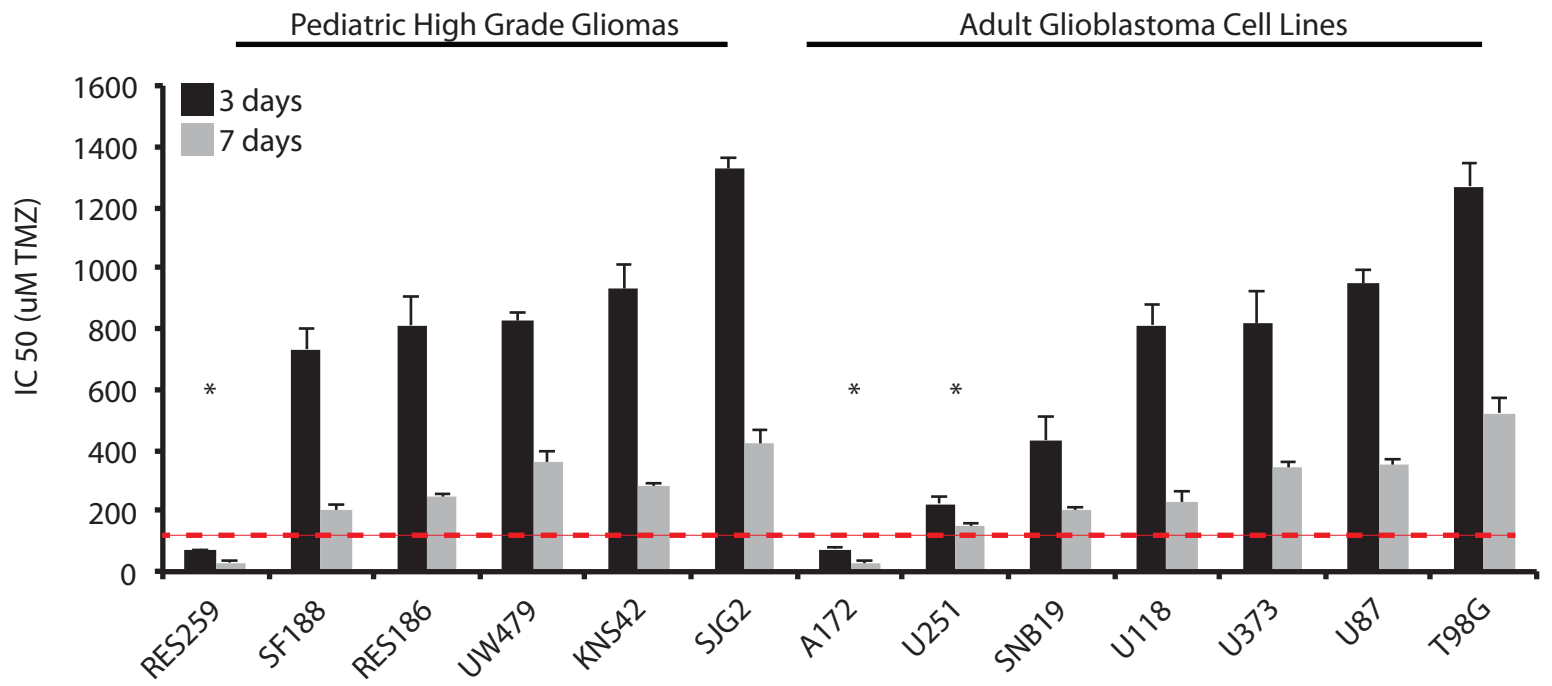

B

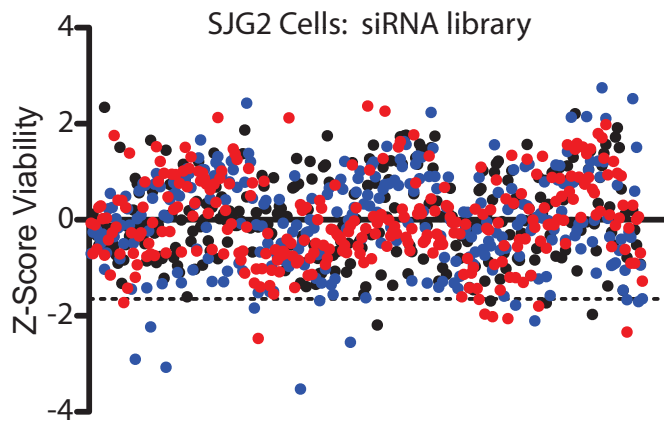

C

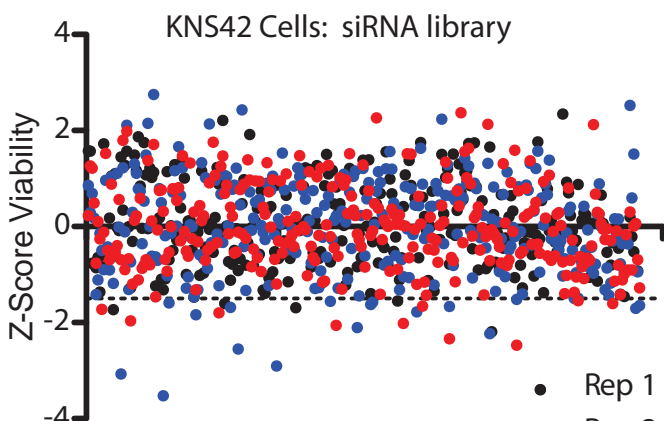

D

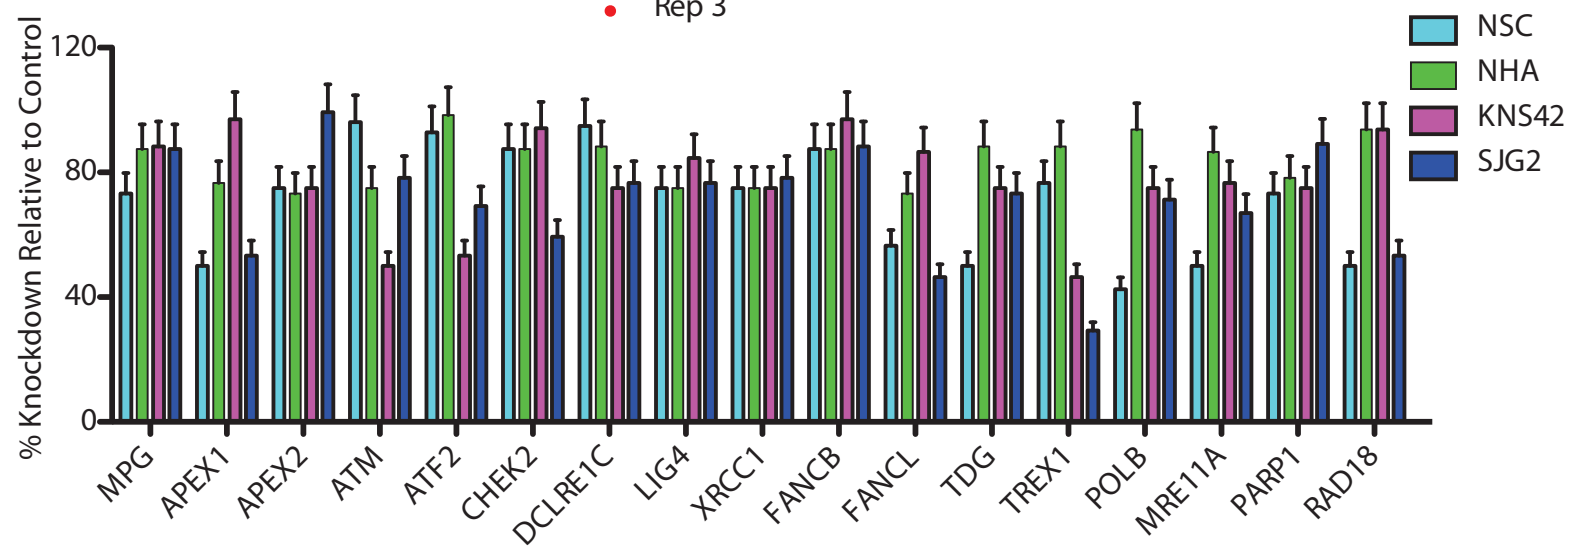

E

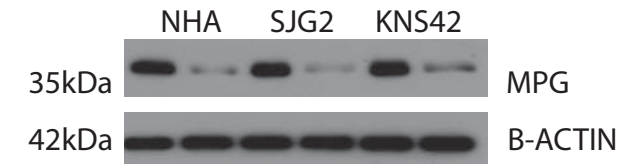

F

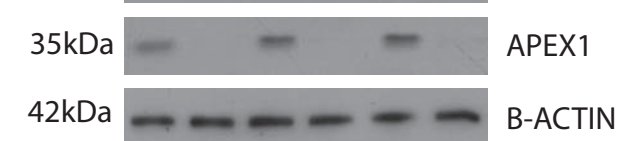

G

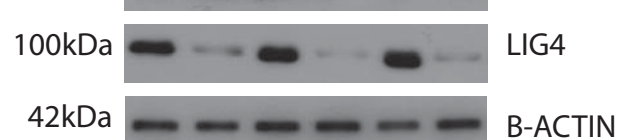

H

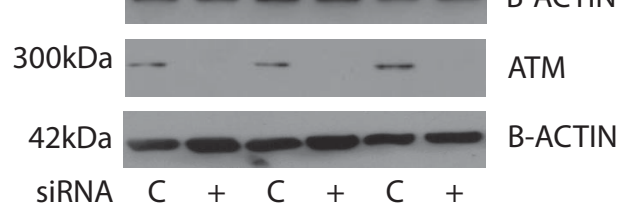

A

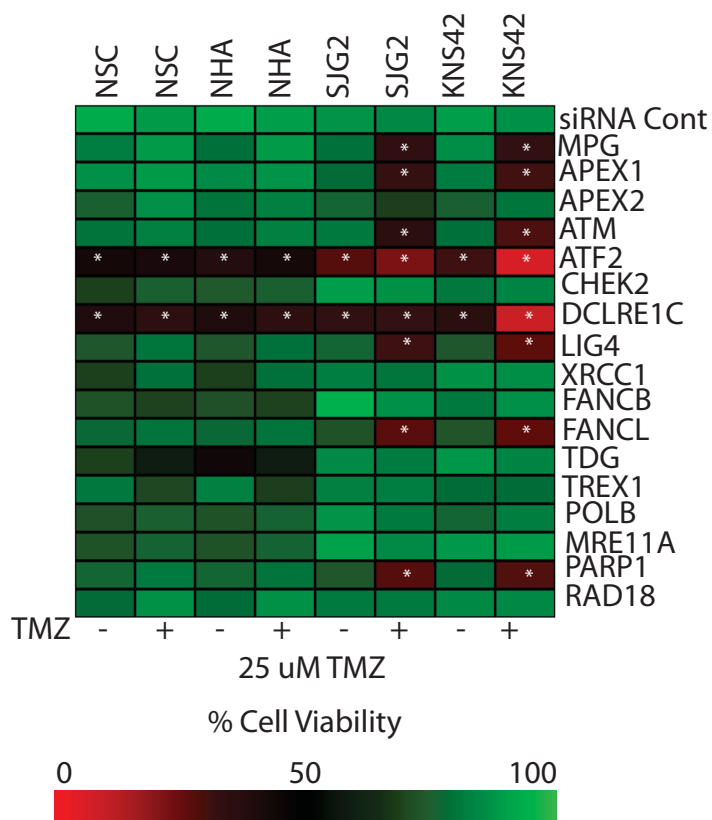

B

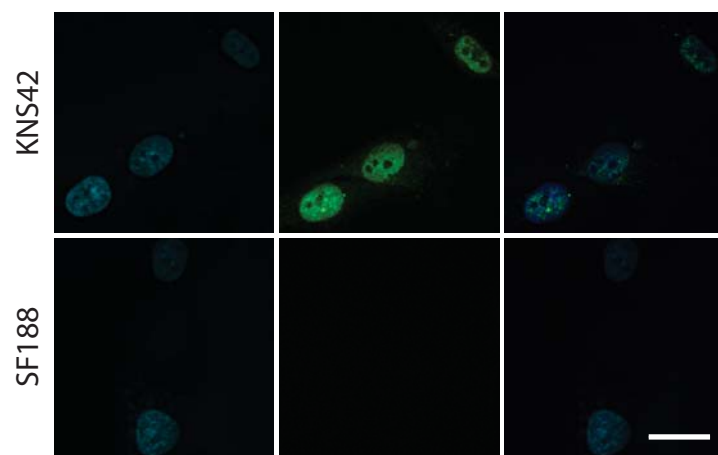

C

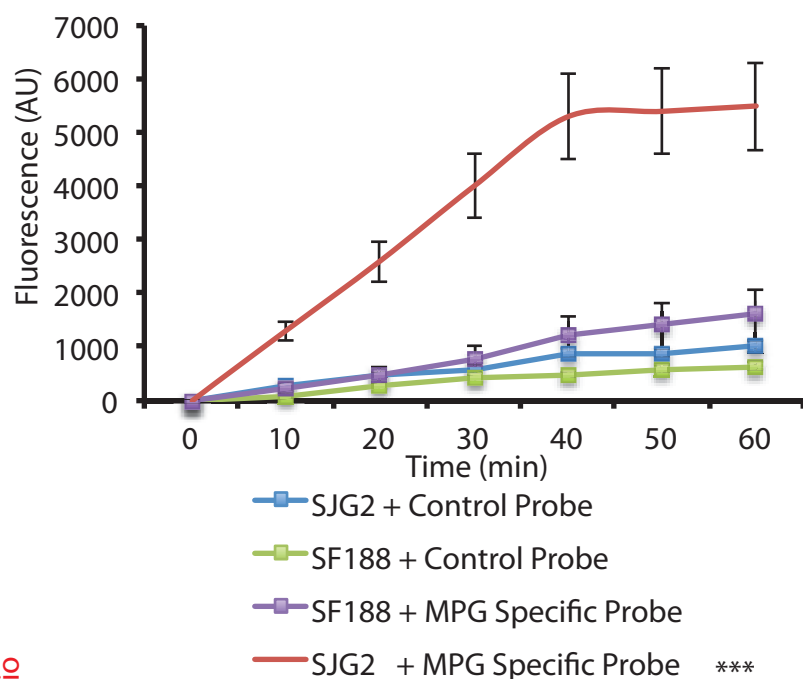

D

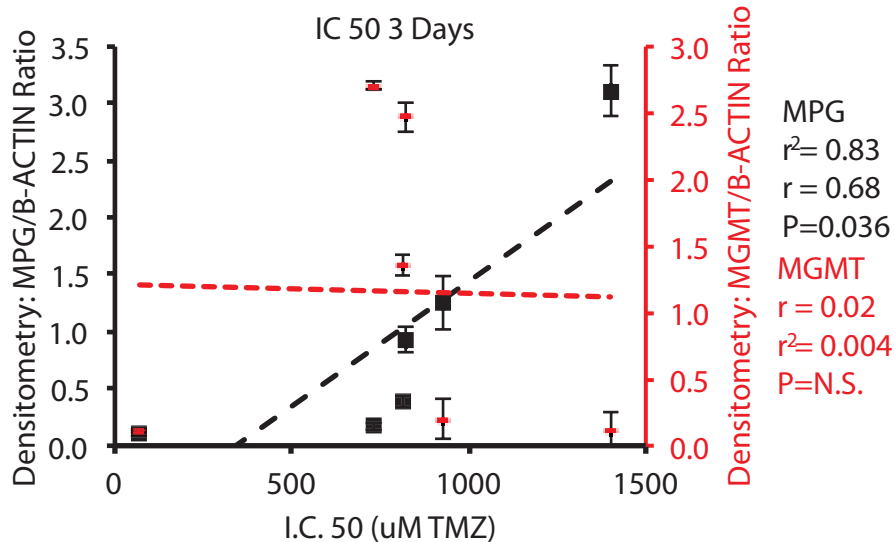

E

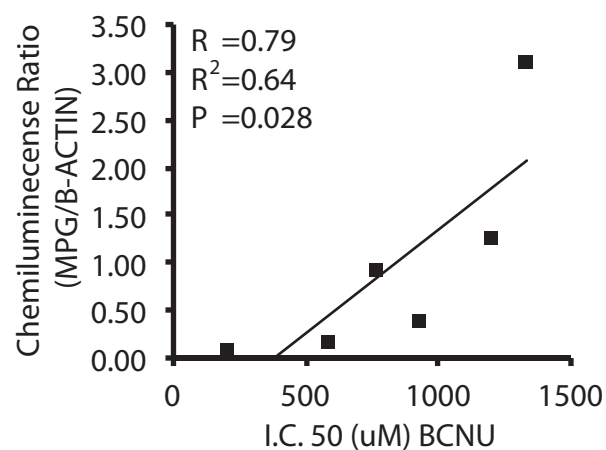

F

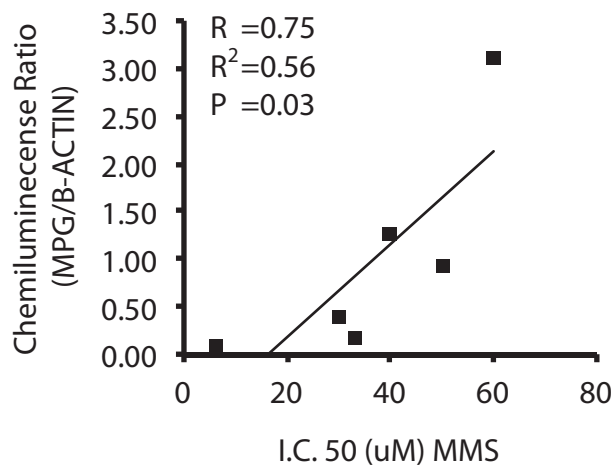

G

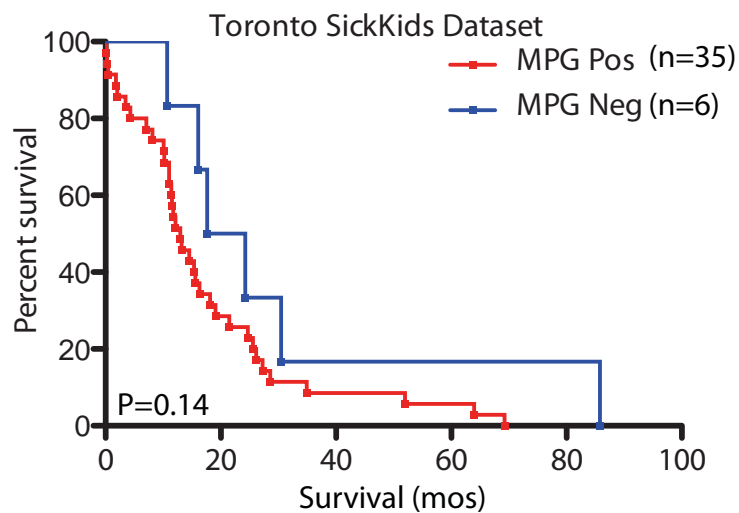

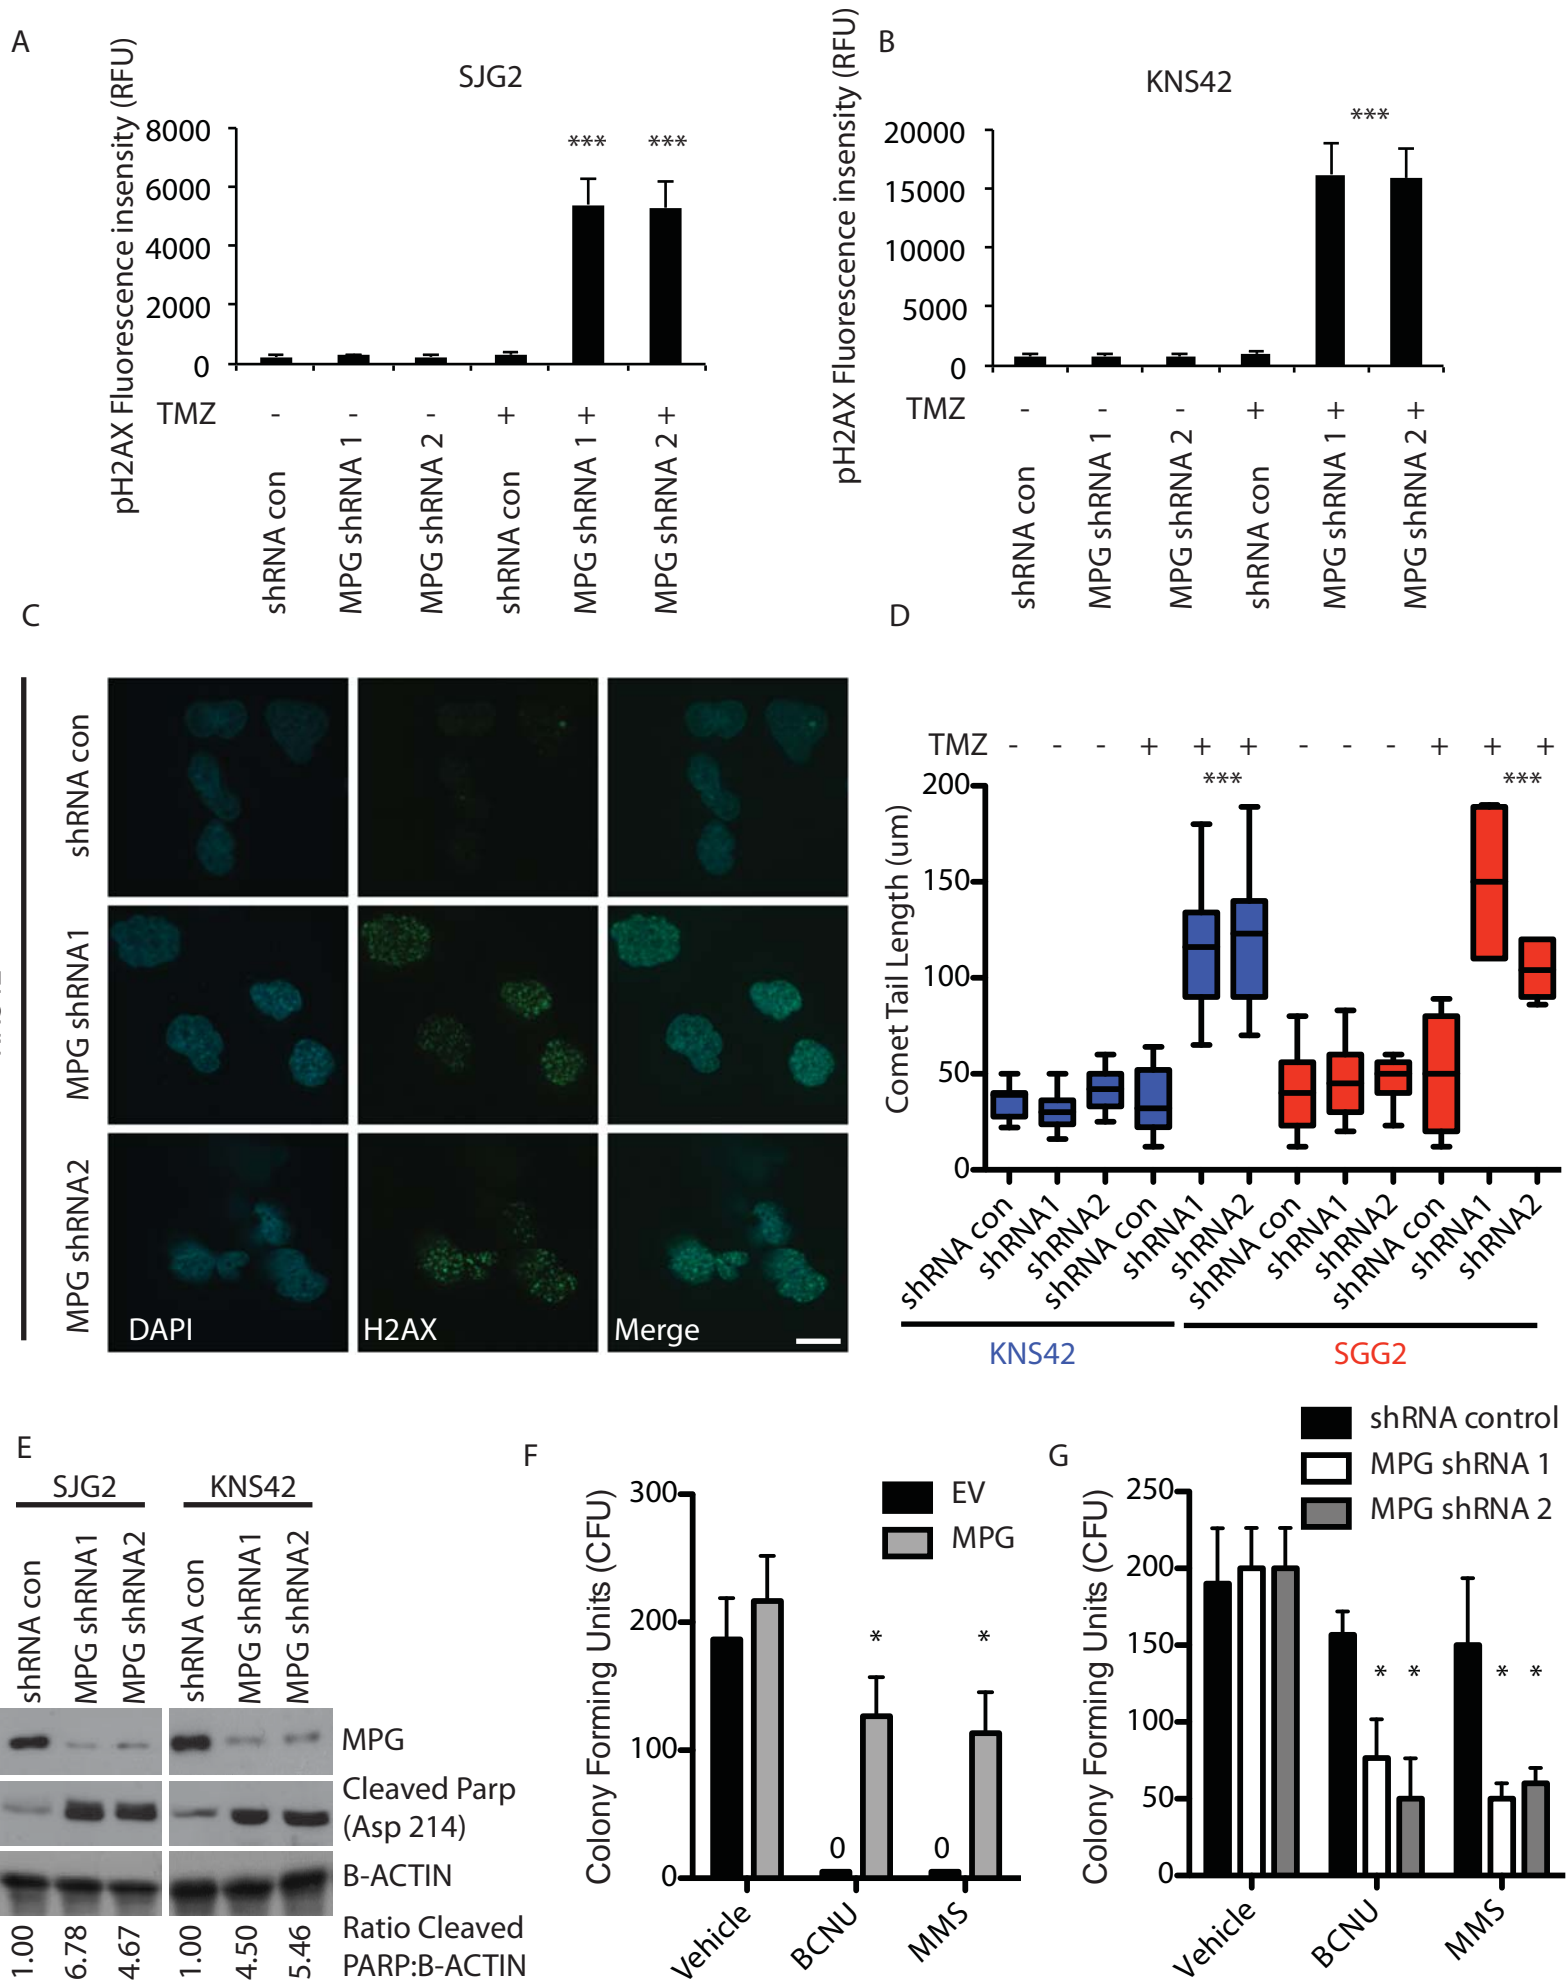

A

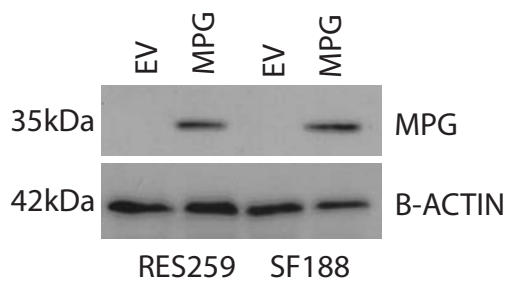

B

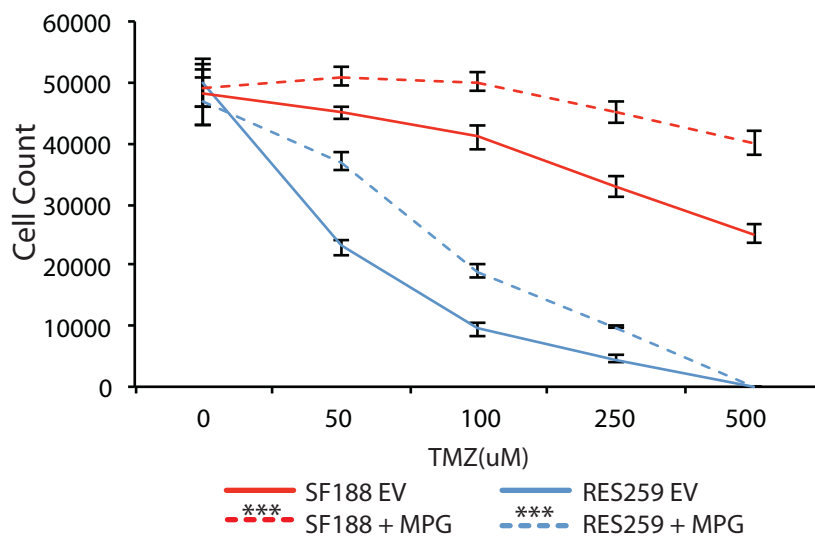

C

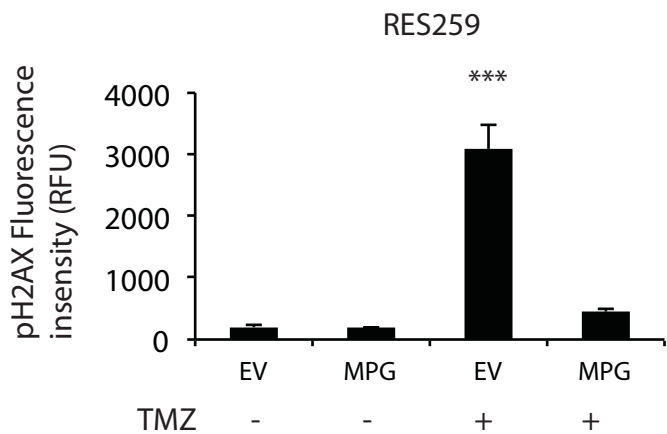

D

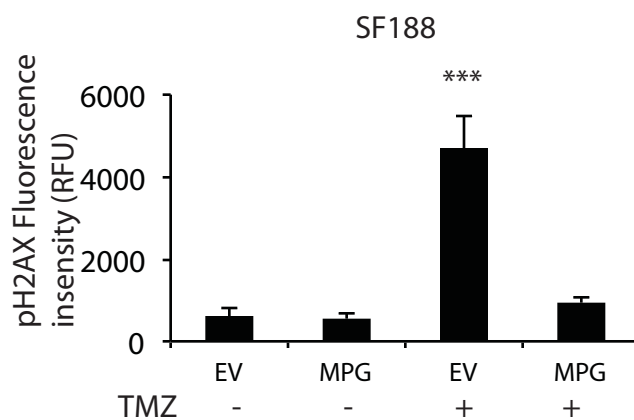

E

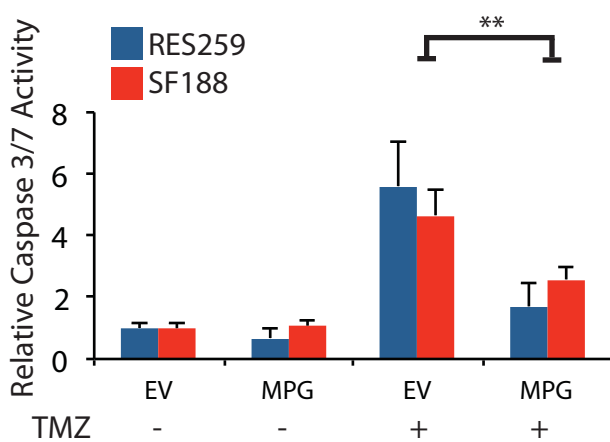

F

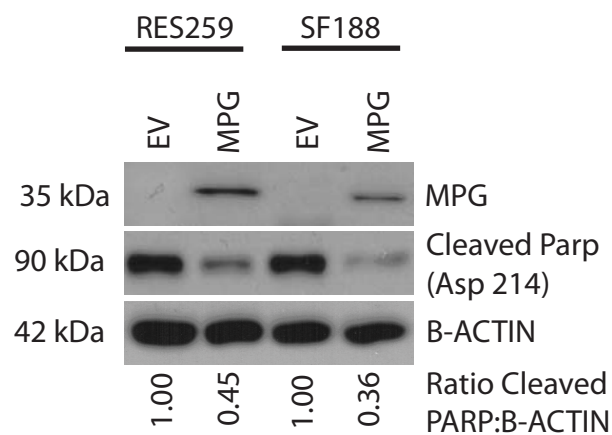

G

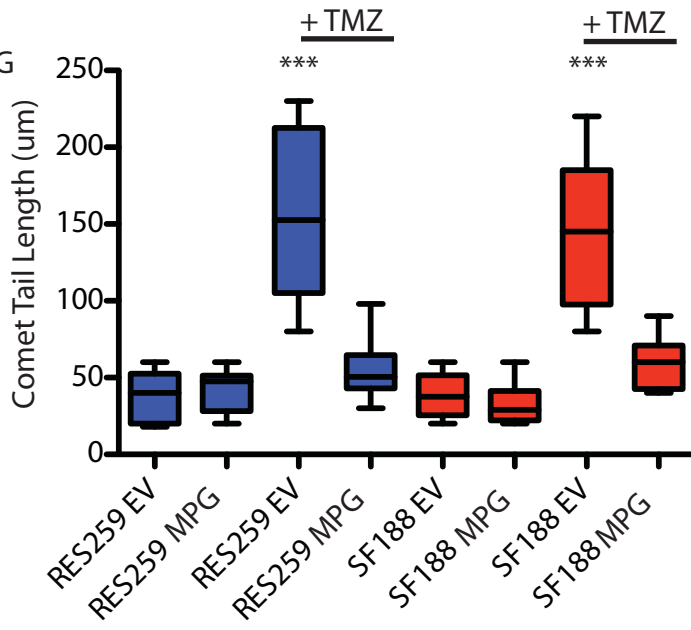

H

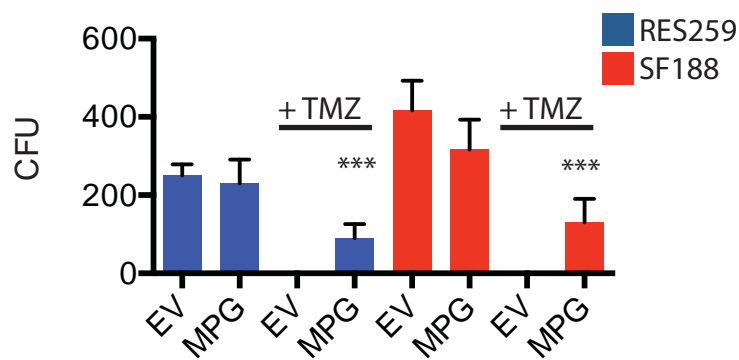

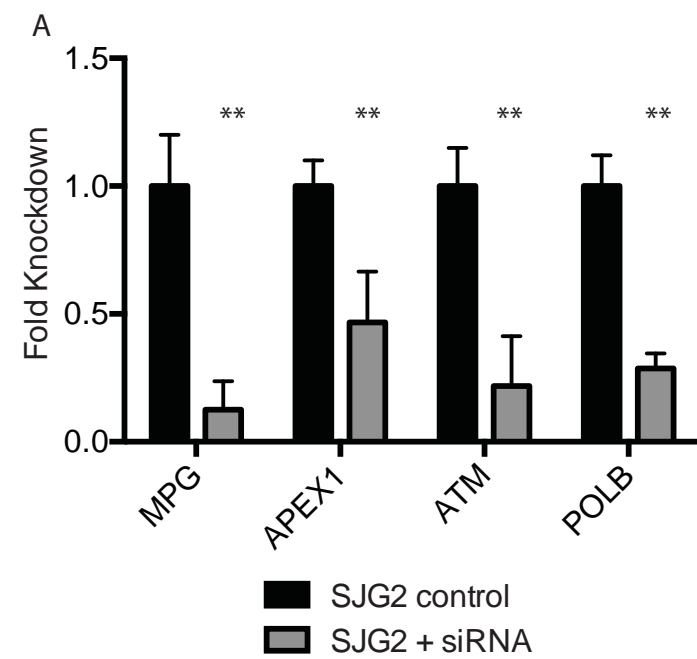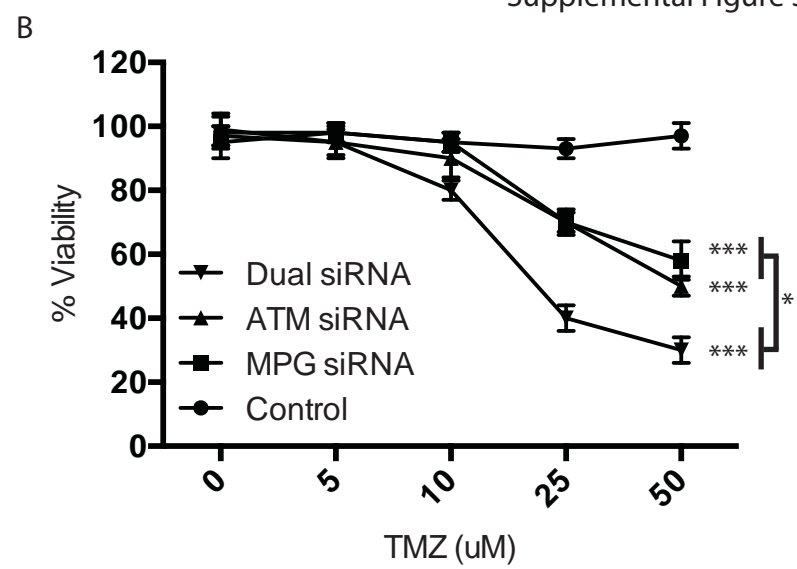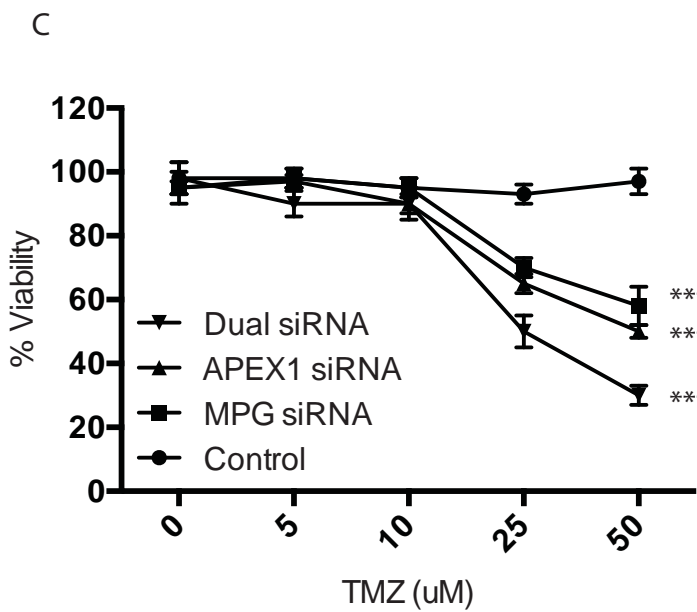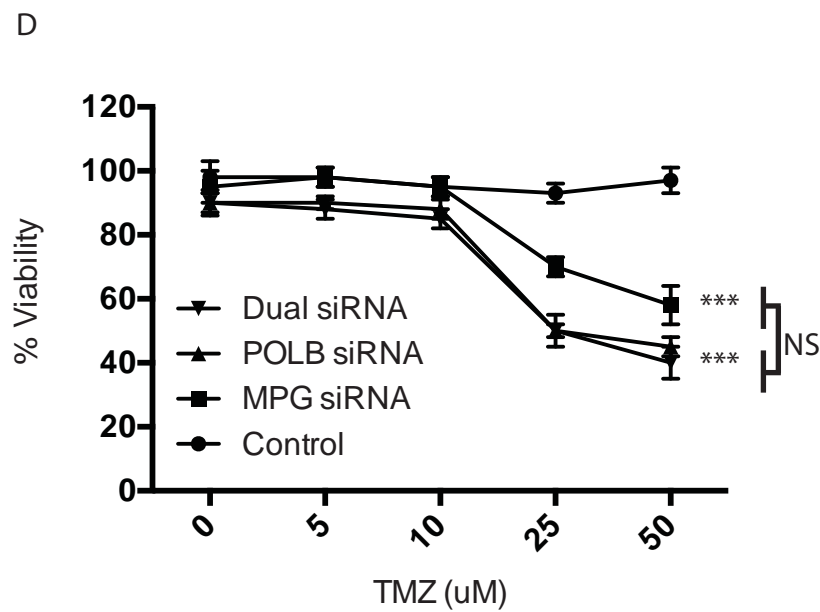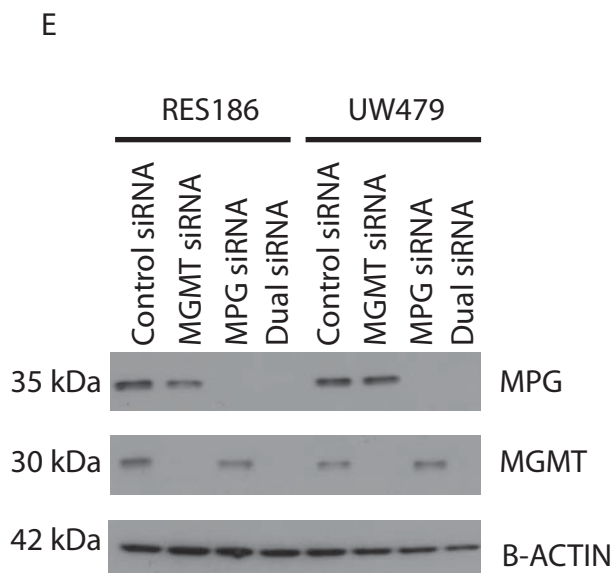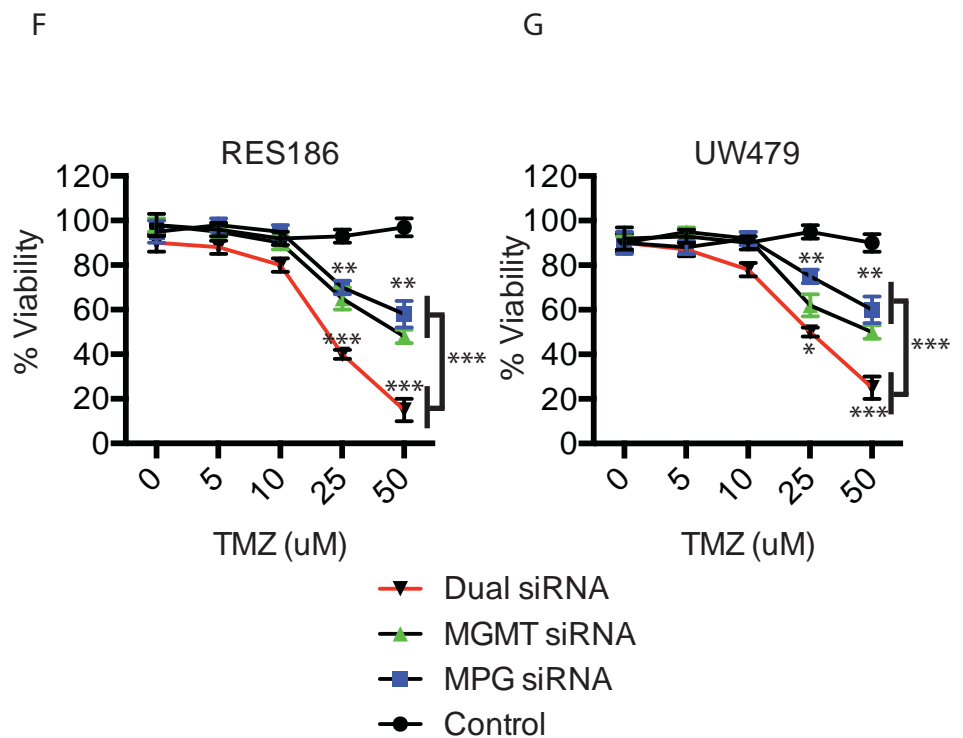

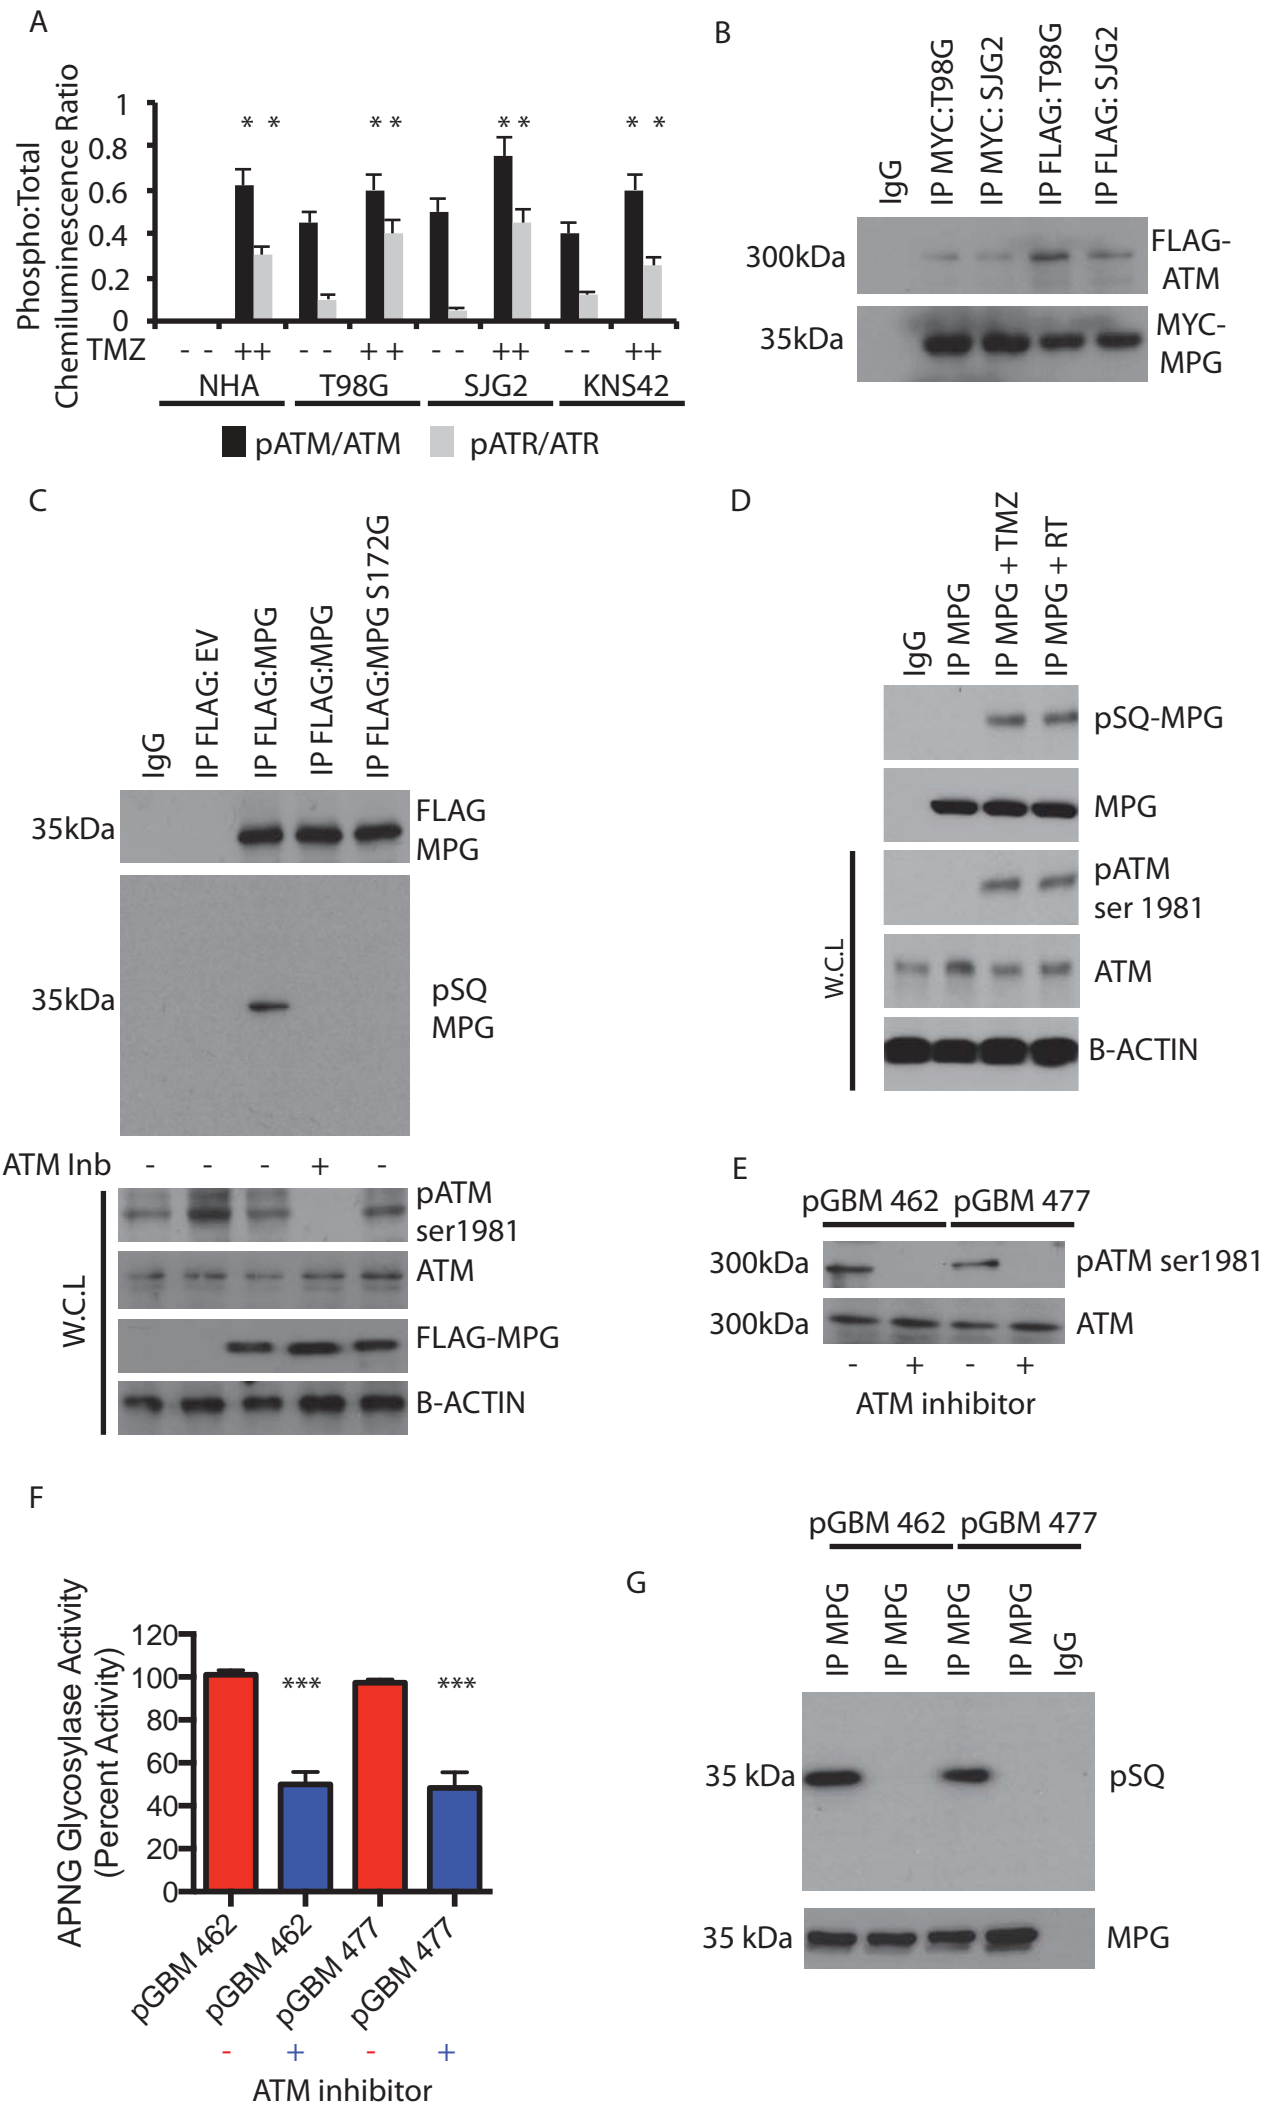

A

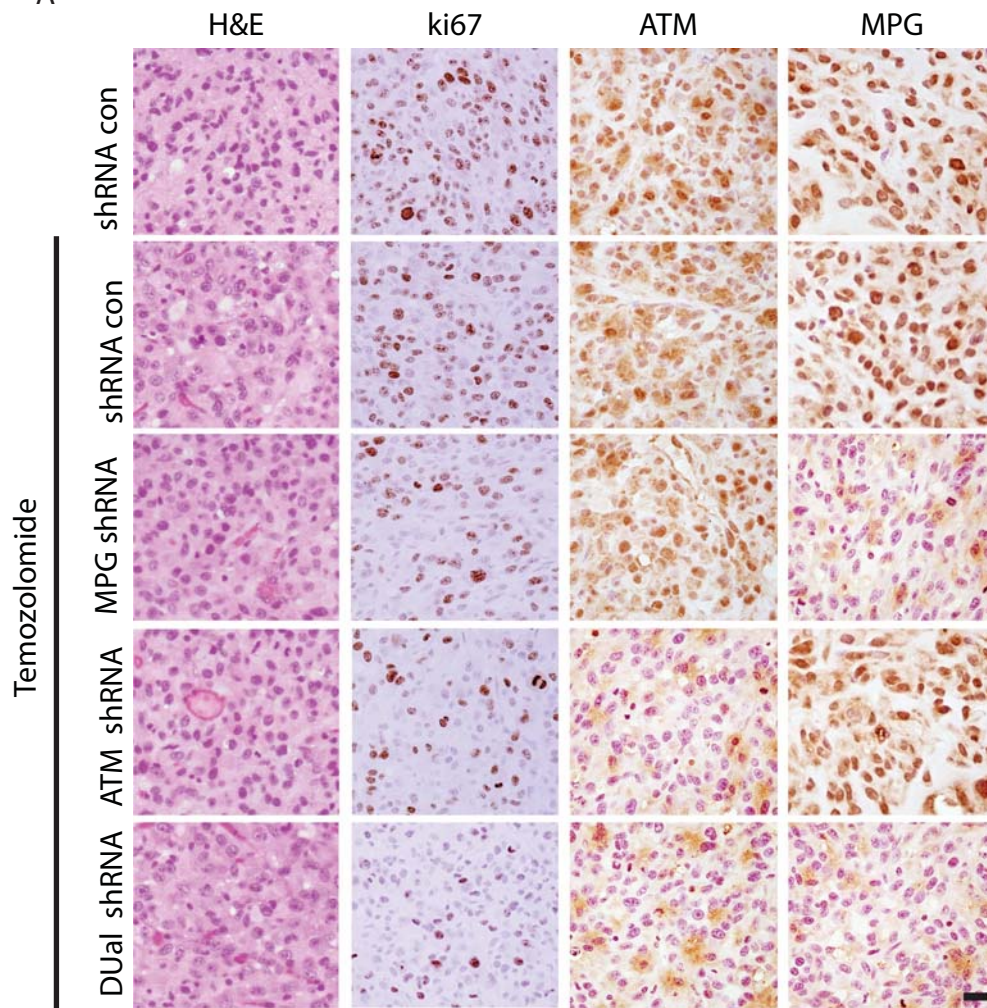

B

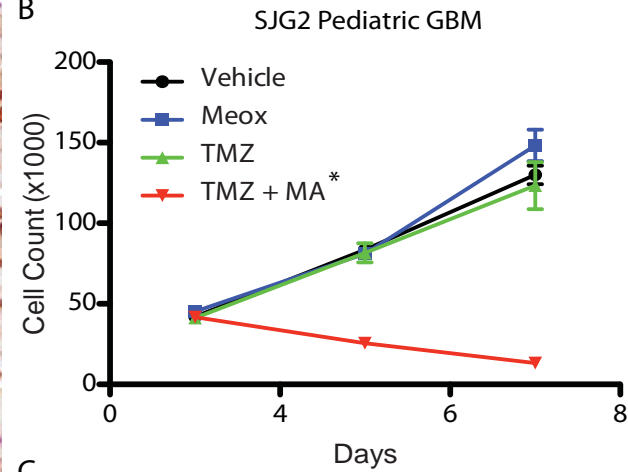

C

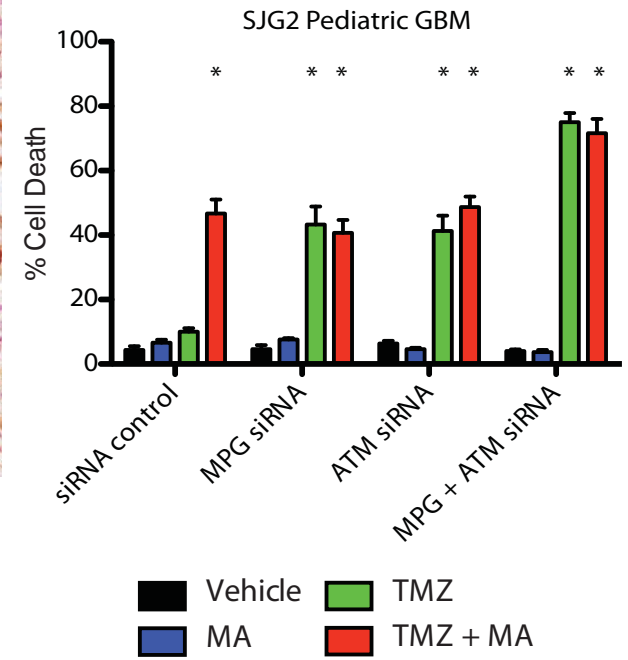

D

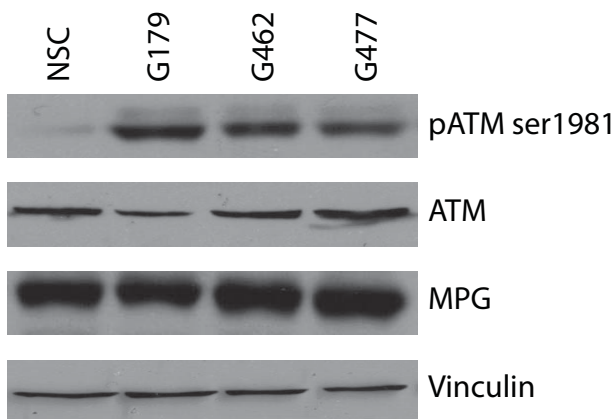

E

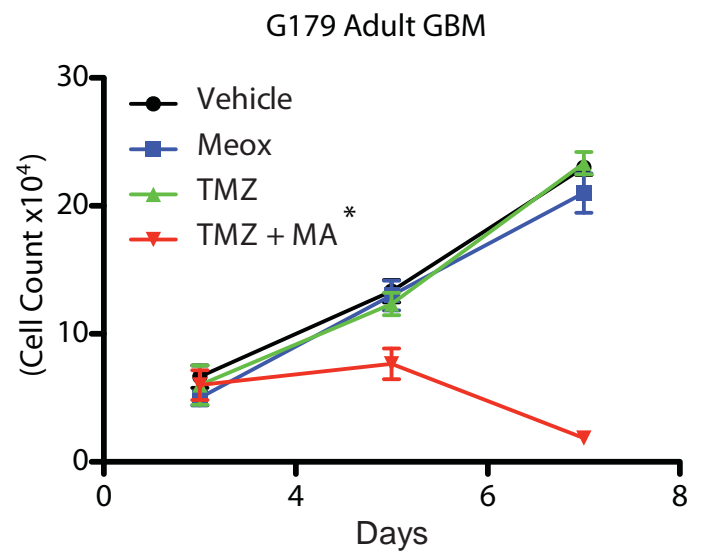

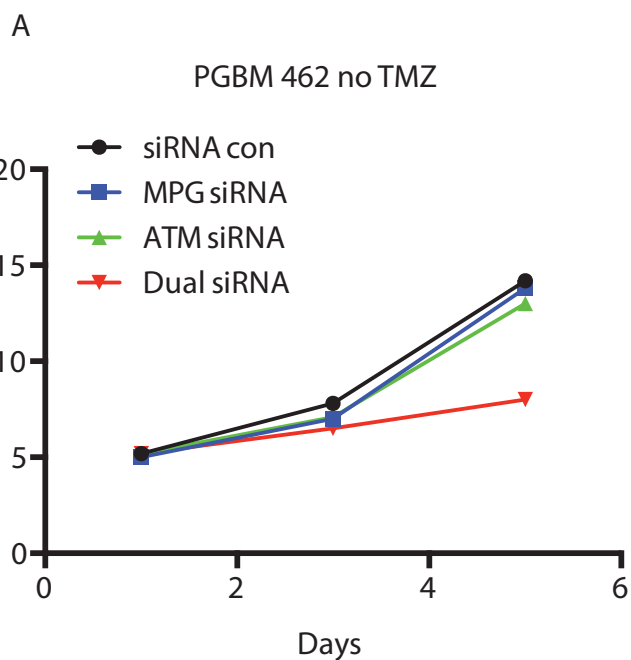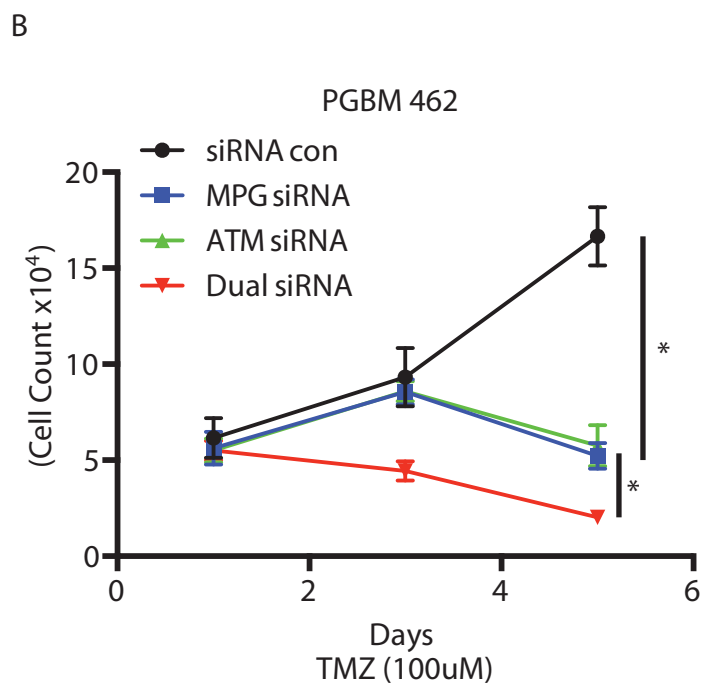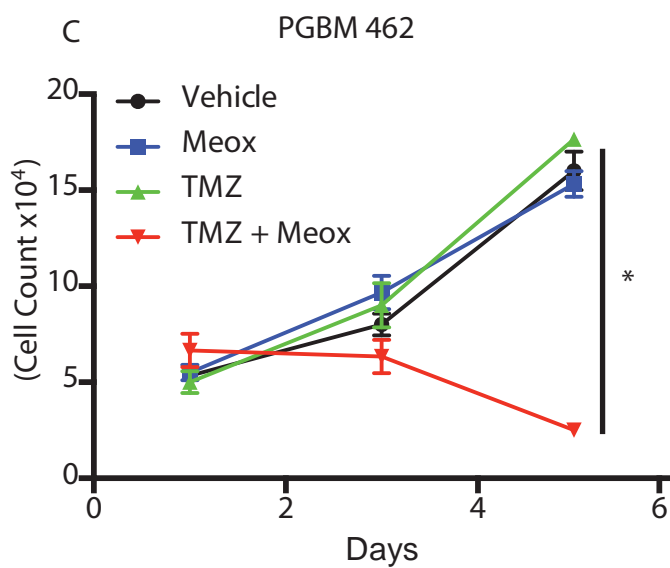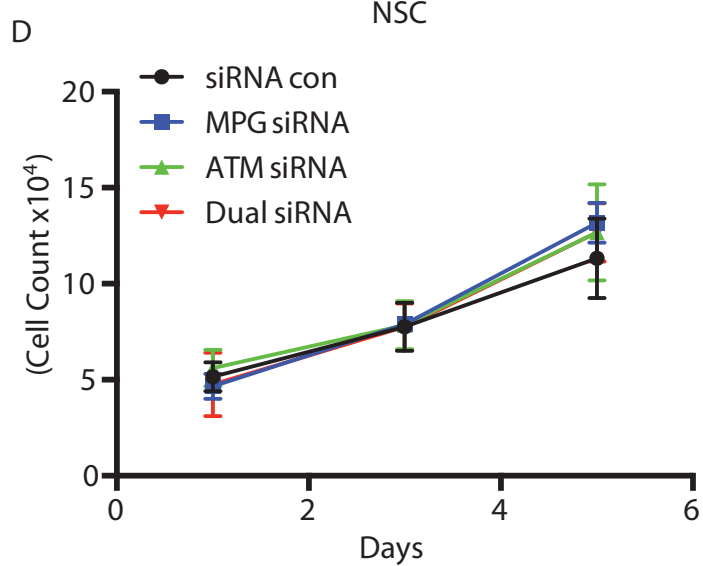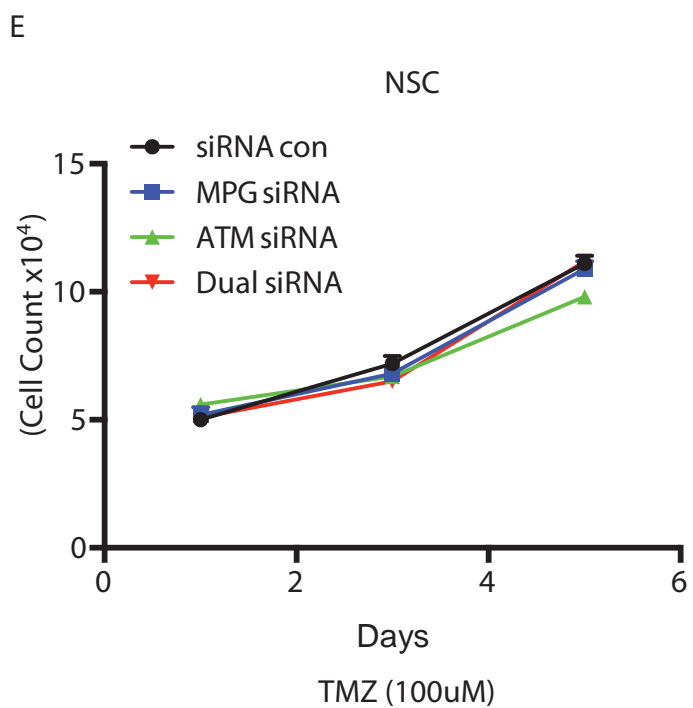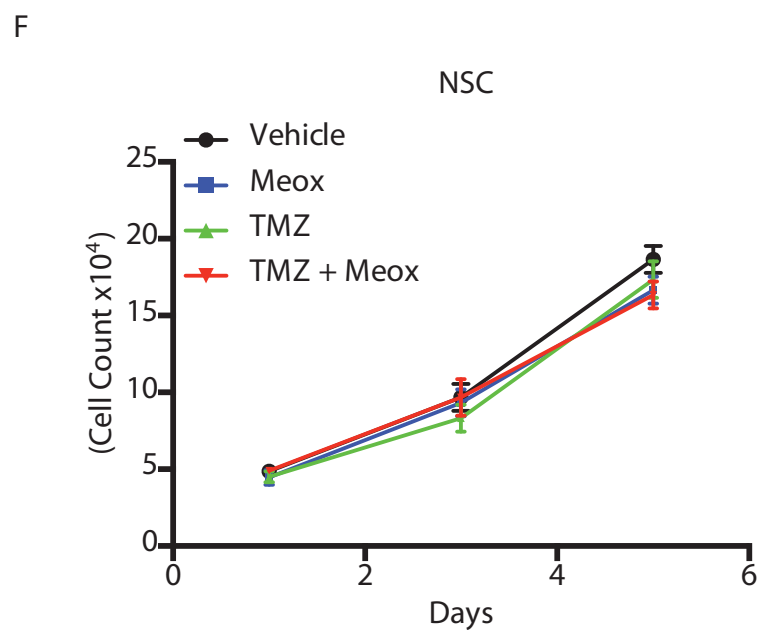



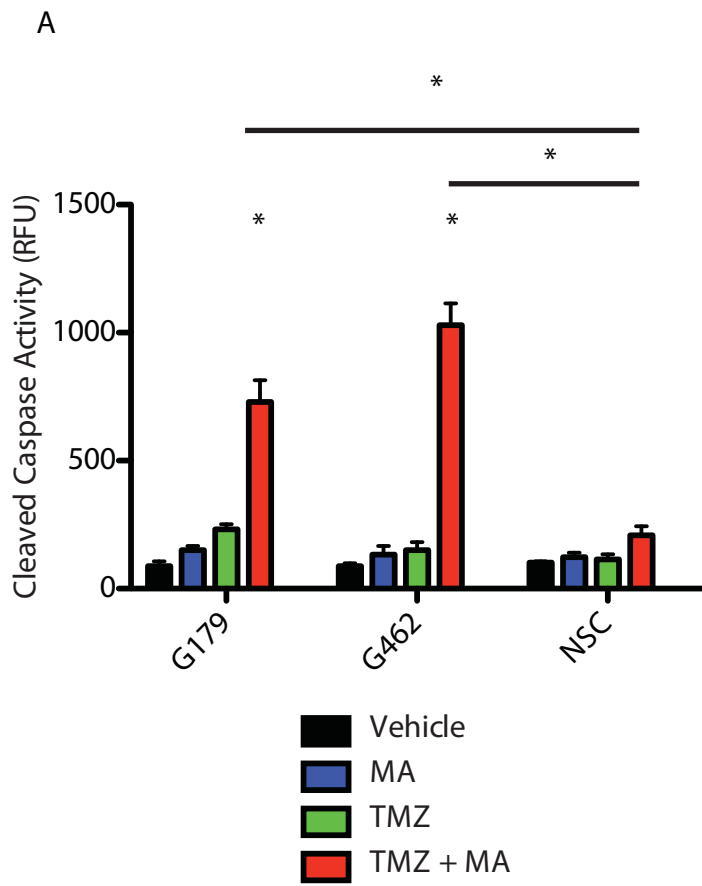**B**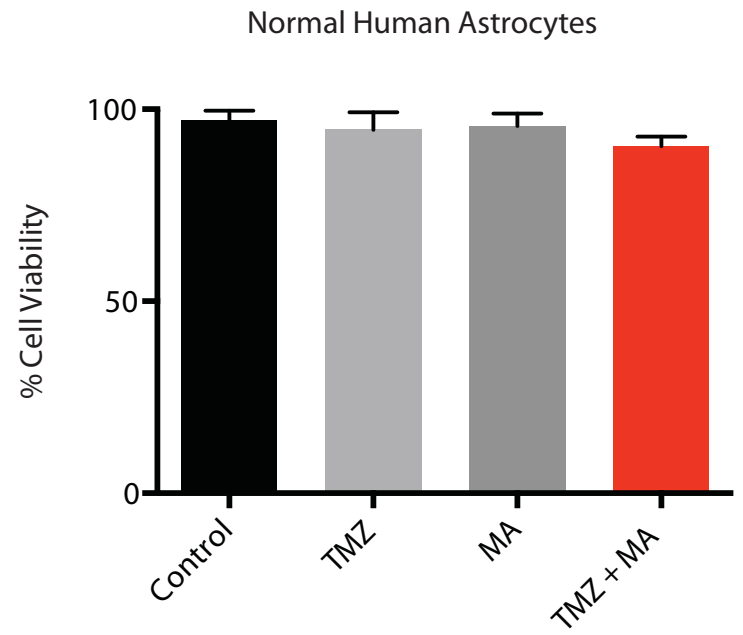**C**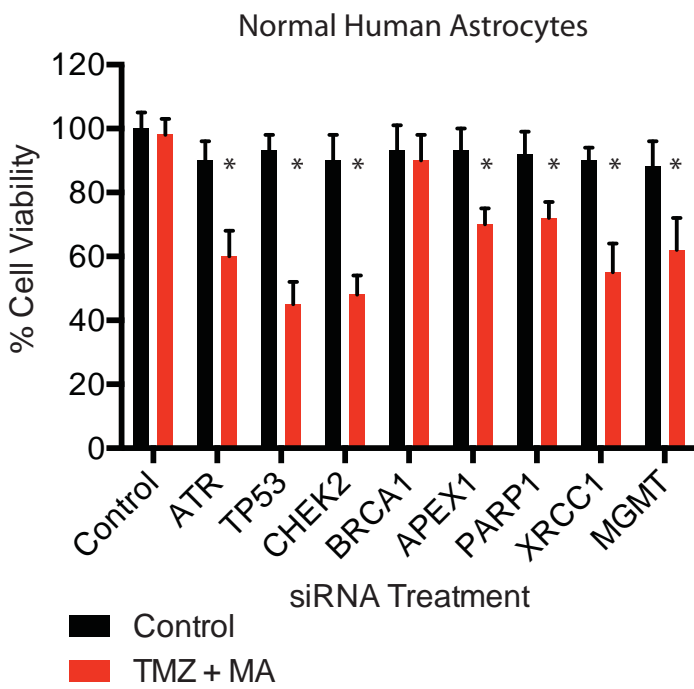

Supplement: NIHMS620077-supplement-1.pdf [file NIHMS620077-supplement-1.pdf]
